# Supplementary material for: Metallic three-coordinated carbon networks with eight-membered rings showing high density of states at the Fermi level
Source: Royal Society of Chemistry journal article supplement (doi:10.1039/c4cp00159a), 2014-01-01
Supplement: c4cp00159a1.pdf [file c4cp00159a1.pdf]

## Supporting Information for ‘Metallic three-coordinated carbon networks with eight-membered rings showing high density of states at Fermi level’

Yusuke Noda, Shota Ono, and Kaoru Ohno

*Department of Physics, Graduate School of Engineering, Yokohama National University, Yokohama, 240-8501, Japan*

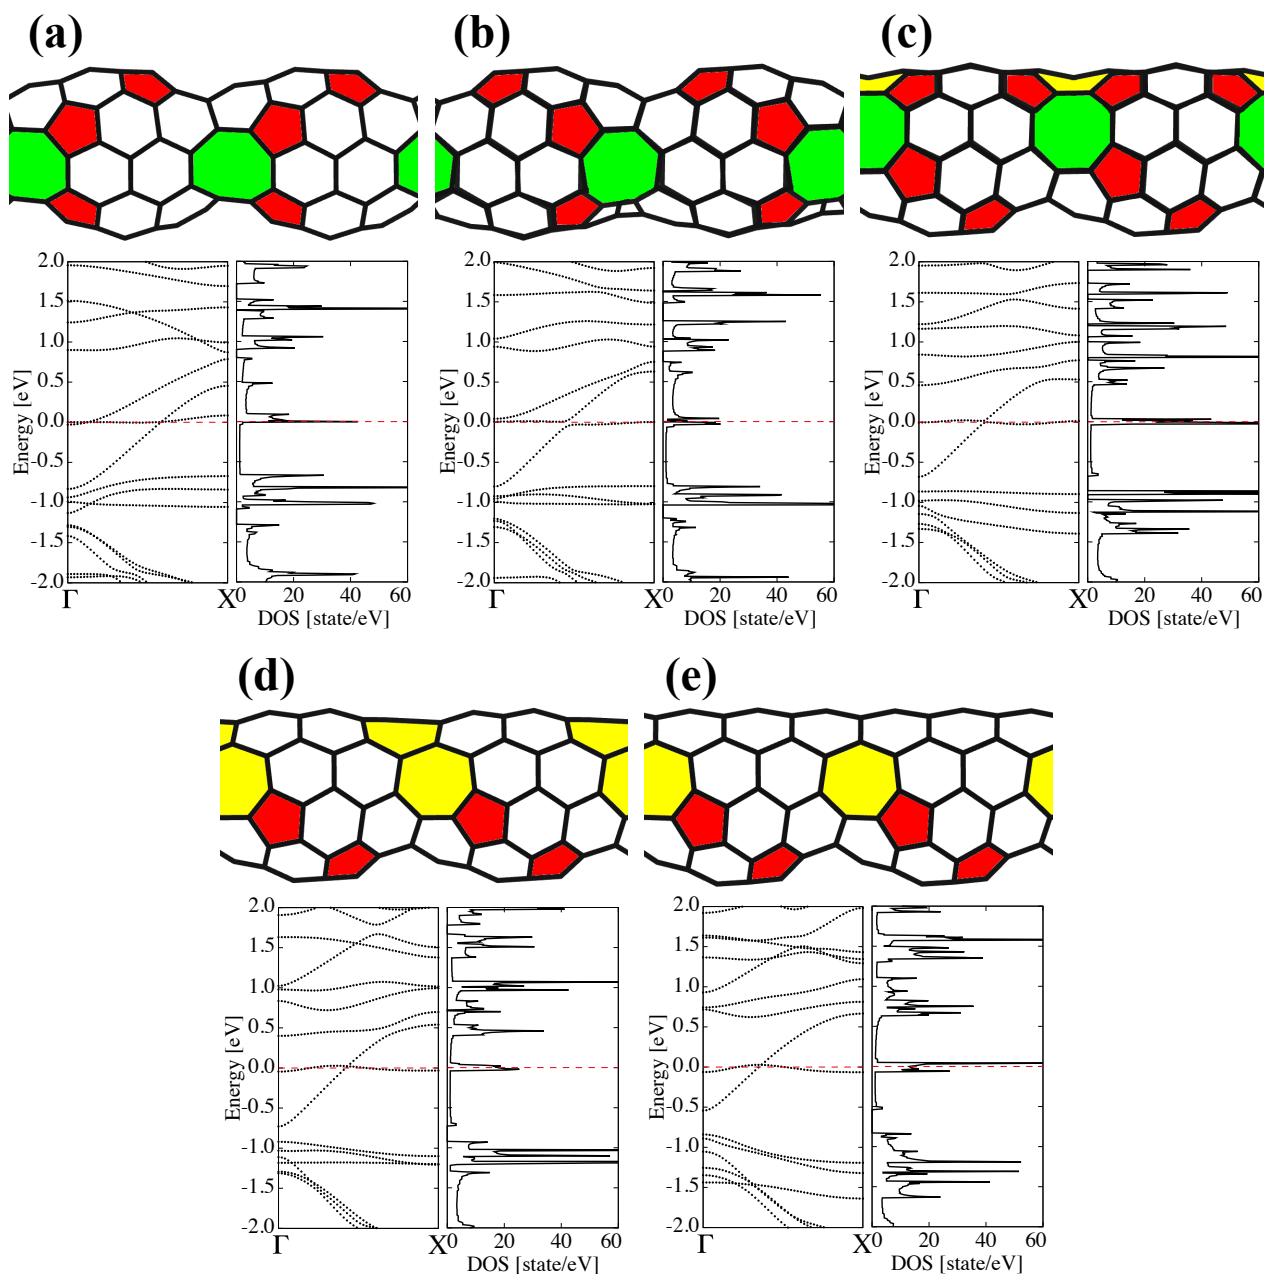

**Figure S1:** Geometrical structure, electronic dispersion curves along the  $\Gamma$ -X direction and DOS of one-dimensional (1D) peanut-shaped fullerene polymers (PSFPs). These models, (a), (b), (c), (d), and (e) are different from each other, and they have eight-membered rings adjoined to two five-membered rings (i.e., Mickey Mouse-shaped defects).

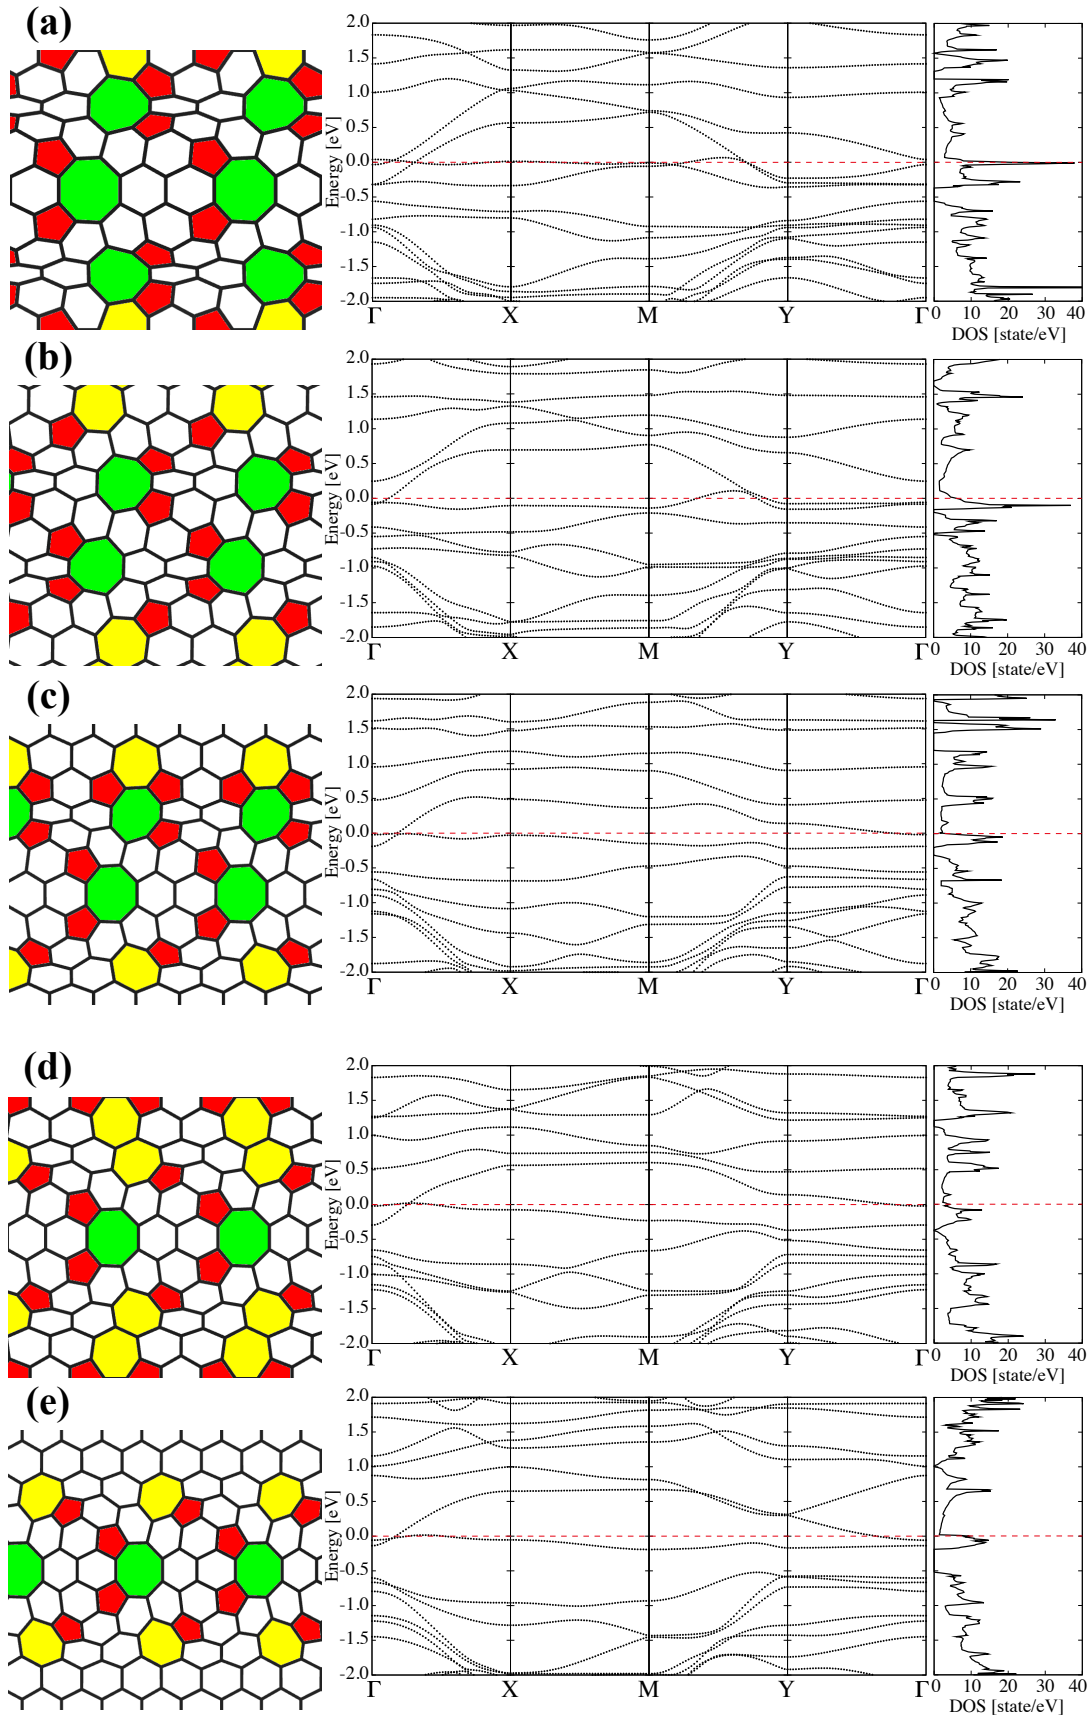

**Figure S2:** Geometrical structure, electronic dispersion curves along the  $\Gamma$ -X-M-Y- $\Gamma$  directions and DOS of corrugated graphene sheets with Mickey Mouse-shaped defects that are periodically aligned parallel to the y-direction. These models are created by unzipping 1D PSFPs, (a), (b), (c), (d), and (e) in Figure S1 along the tube axis and repeat the pattern periodically, respectively.
